# Supplementary material for: Global Invasion of Lantana camara: Has the Climatic Niche Been Conserved across Continents?
Source: PLoS One. 2014 Oct 24;9(10):e111468. doi: 10.1371/journal.pone.0111468 (PMC4208836; doi:10.1371/journal.pone.0111468)
Supplement: Table S1 — Occurrence records of L. camara used in this study. (CSV) [file pone.0111468.s001.csv]

SPECIE	LONGITUDE	LATITUDE	REGION
Lcamara	-100.9374959	18.22917075	native
Lcamara	-100.9374959	18.27083742	native
Lcamara	-101.0208292	18.27083742	native
Lcamara	-101.1874959	18.22917075	native
Lcamara	-101.6041626	18.18750408	native
Lcamara	-101.6041626	18.31250408	native
Lcamara	-101.6041626	18.35417075	native
Lcamara	-101.7708293	18.39583742	native
Lcamara	-101.8124959	18.52083743	native
Lcamara	-102.562496	20.02083751	native
Lcamara	-102.8541626	21.43750425	native
Lcamara	-103.1041627	22.60417097	native
Lcamara	-103.1458293	21.1041709	native
Lcamara	-103.187496	21.2291709	native
Lcamara	-103.2291627	21.35417091	native
Lcamara	-103.2291627	22.52083764	native
Lcamara	-103.2708293	22.02083761	native
Lcamara	-103.312496	20.68750421	native
Lcamara	-103.437496	20.52083753	native
Lcamara	-103.4791627	20.31250419	native
Lcamara	-103.7291627	20.14583751	native
Lcamara	-103.812496	20.35417086	native
Lcamara	-103.812496	21.85417094	native
Lcamara	-103.8541627	20.77083755	native
Lcamara	-103.9791627	20.22917085	native
Lcamara	-103.9791627	22.64583764	native
Lcamara	-105.0208294	21.52083759	native
Lcamara	-105.0624961	21.52083759	native
Lcamara	-35.02082577	-7.937497285	native
Lcamara	-35.68749247	-6.979163901	native
Lcamara	-35.68749247	-8.47916398	native
Lcamara	-35.68749247	-8.604163986	native
Lcamara	-36.02082582	-8.312497304	native
Lcamara	-36.02082582	-8.395830642	native
Lcamara	-37.10415921	-7.187497246	native
Lcamara	-37.43749256	-7.187497246	native
Lcamara	-38.93749264	-14.10416427	native
Lcamara	-39.06249265	-14.31249762	native
Lcamara	-39.06249265	-15.31249767	native
Lcamara	-39.10415932	-13.31249757	native
Lcamara	-39.27082599	-12.31249751	native
Lcamara	-39.56249268	-15.35416434	native
Lcamara	-39.68749268	-7.145830577	native
Lcamara	-40.31249271	-12.52083086	native
Lcamara	-41.06249275	-11.47916414	native
Lcamara	-41.52082611	-12.39583085	native
Lcamara	-41.68749279	-13.2708309	native
Lcamara	-41.9374928	-13.52083091	native
Lcamara	-41.97915947	-13.52083091	native
Lcamara	-42.35415949	-13.77083092	native
Lcamara	-42.39582616	-13.77083092	native
Lcamara	-43.35415954	-18.43749783	native
Lcamara	-43.60415955	-18.52083117	native
Lcamara	-43.68749289	-20.31249793	native
Lcamara	-43.72915956	-19.8124979	native
Lcamara	-44.18749292	-17.77083113	native
Lcamara	-44.64582627	-13.31249757	native
Lcamara	-46.39582637	-14.31249762	native
Lcamara	-46.52082637	-22.81249806	native
Lcamara	-46.64582638	-23.60416477	native
Lcamara	-46.81249305	-22.8958314	native
Lcamara	-47.10415974	-15.31249767	native
Lcamara	-47.1458264	-22.2291647	native
Lcamara	-49.72915987	-3.937497076	native
Lcamara	-51.81249331	-16.97916442	native
Lcamara	-52.31249334	4.937503387	native
Lcamara	-52.52082668	-4.812497122	native
Lcamara	-52.85416004	-2.229163654	native
Lcamara	-53.06249338	5.270836737	native
Lcamara	-53.18749339	3.645836653	native
Lcamara	-56.89582691	4.770836711	native
Lcamara	-58.56249367	6.312503458	native
Lcamara	-59.35416037	3.979170003	native
Lcamara	-59.47916038	3.39583664	native
Lcamara	-60.68749378	-2.812497017	native
Lcamara	-61.02082713	-14.77083097	native
Lcamara	-61.10416047	9.187503608	native
Lcamara	-61.14582713	4.604170036	native
Lcamara	-61.47916049	-14.6041643	native
Lcamara	-61.52082715	8.979170264	native
Lcamara	-61.60416049	5.604170088	native
Lcamara	-61.64582716	5.687503426	native
Lcamara	-62.47916054	-19.27083121	native
Lcamara	-62.52082721	-16.39583106	native
Lcamara	-63.18749391	-17.85416447	native
Lcamara	-63.18749391	-17.89583114	native
Lcamara	-63.18749391	-21.89583135	native
Lcamara	-63.64582727	10.64583702	native
Lcamara	-63.68749393	-18.27083116	native
Lcamara	-63.68749393	10.64583702	native
Lcamara	-63.77082727	-16.97916442	native
Lcamara	-63.89582728	-19.77083124	native
Lcamara	-64.02082728	-22.39583137	native
Lcamara	-64.10416062	4.437503361	native
Lcamara	-64.35416064	10.35417034	native
Lcamara	-64.35416064	2.31250325	native
Lcamara	-64.35416064	2.437503256	native
Lcamara	-65.77082738	18.31250408	native
Lcamara	-65.81249404	18.31250408	native
Lcamara	-65.85416071	18.31250408	native
Lcamara	-66.22916073	18.0208374	native
Lcamara	-66.2708274	18.27083742	native
Lcamara	-66.31249407	-14.81249764	native
Lcamara	-66.47916075	2.104169906	native
Lcamara	-66.52082741	18.22917075	native
Lcamara	-66.56249408	1.93750323	native
Lcamara	-66.60416075	-14.52083096	native
Lcamara	-66.60416075	18.0208374	native
Lcamara	-66.64582742	10.22917033	native
Lcamara	-66.72916076	4.062503341	native
Lcamara	-67.02082744	3.979170003	native
Lcamara	-67.06249411	1.895836561	native
Lcamara	-67.06249411	1.93750323	native
Lcamara	-67.06249411	18.39583742	native
Lcamara	-67.22916079	-11.47916414	native
Lcamara	-67.27082745	-13.06249755	native
Lcamara	-67.39582746	8.854170258	native
Lcamara	-67.43749413	-12.18749751	native
Lcamara	-67.6041608	10.43750367	native
Lcamara	-67.64582747	-15.22916433	native
Lcamara	-67.68749414	4.062503341	native
Lcamara	-67.68749414	6.562503472	native
Lcamara	-67.68749414	9.354170284	native
Lcamara	-67.81249415	5.229170069	native
Lcamara	-67.93749416	-14.39583095	native
Lcamara	-68.06249416	-14.22916428	native
Lcamara	-68.31249418	5.312503406	native
Lcamara	-68.56249419	-14.31249762	native
Lcamara	-68.56249419	-14.39583095	native
Lcamara	-68.60416086	-14.31249762	native
Lcamara	-68.68749419	-14.56249763	native
Lcamara	-68.77082753	-15.22916433	native
Lcamara	-68.85416087	-13.02083088	native
Lcamara	-69.4791609	18.97917079	native
Lcamara	-69.52082757	19.31250414	native
Lcamara	-69.68749425	11.22917038	native
Lcamara	-69.77082758	18.47917076	native
Lcamara	-69.85416092	18.47917076	native
Lcamara	-69.93749426	18.47917076	native
Lcamara	-69.97916093	18.52083743	native
Lcamara	-70.10416094	18.43750409	native
Lcamara	-70.22916094	18.47917076	native
Lcamara	-70.27082761	-3.770830401	native
Lcamara	-70.27082761	-3.81249707	native
Lcamara	-70.27082761	3.770836659	native
Lcamara	-70.27082761	3.812503328	native
Lcamara	-70.31249428	18.31250408	native
Lcamara	-70.31249428	19.43750414	native
Lcamara	-70.35416095	19.18750413	native
Lcamara	-70.39582762	18.31250408	native
Lcamara	-70.39582762	19.14583746	native
Lcamara	-70.39582762	19.31250414	native
Lcamara	-70.43749429	18.72917077	native
Lcamara	-70.43749429	19.43750414	native
Lcamara	-70.6874943	19.47917081	native
Lcamara	-70.72916097	18.89583745	native
Lcamara	-70.77082764	18.89583745	native
Lcamara	-70.77082764	18.97917079	native
Lcamara	-70.81249431	18.77083744	native
Lcamara	-70.85416097	18.77083744	native
Lcamara	-70.97916098	18.35417075	native
Lcamara	-71.10416099	8.645836913	native
Lcamara	-71.14582766	8.604170245	native
Lcamara	-71.18749433	-12.85416421	native
Lcamara	-71.18749433	19.39583747	native
Lcamara	-71.39582767	18.52083743	native
Lcamara	-71.39582767	19.31250414	native
Lcamara	-71.77082769	18.31250408	native
Lcamara	-71.77082769	6.145836783	native
Lcamara	-72.0208277	9.104170271	native
Lcamara	-72.52082773	9.729170303	native
Lcamara	-72.72916107	-12.31249751	native
Lcamara	-72.77082774	-12.81249754	native
Lcamara	-72.81249441	-8.145830629	native
Lcamara	-72.93749442	-13.68749758	native
Lcamara	-72.97916109	-13.68749758	native
Lcamara	-73.02082775	-8.229163967	native
Lcamara	-73.10416109	-3.479163719	native
Lcamara	-73.27082777	4.854170049	native
Lcamara	-73.27082777	4.895836718	native
Lcamara	-74.02082781	6.020836777	native
Lcamara	-74.10416114	3.437503309	native
Lcamara	-74.31249449	4.937503387	native
Lcamara	-74.64582784	5.1875034	native
Lcamara	-74.72916118	-12.0624975	native
Lcamara	-74.93749452	6.770836816	native
Lcamara	-75.18749453	9.895836979	native
Lcamara	-75.39582788	-10.56249742	native
Lcamara	-75.60416122	20.02083751	native
Lcamara	-75.68749456	1.93750323	native
Lcamara	-75.68749456	19.97917084	native
Lcamara	-75.81249457	5.812503432	native
Lcamara	-76.14582792	-0.104163543	native
Lcamara	-76.14582792	-9.812497383	native
Lcamara	-76.35416126	-3.354163712	native
Lcamara	-76.35416126	-9.270830688	native
Lcamara	-76.39582793	-0.520830231	native
Lcamara	-76.4374946	-2.937497024	native
Lcamara	-76.4374946	-6.562497213	native
Lcamara	-76.68749461	-0.312496887	native
Lcamara	-76.77082795	-7.187497246	native
Lcamara	-77.1041613	8.020836881	native
Lcamara	-77.18749464	7.68750353	native
Lcamara	-77.35416131	17.85417073	native
Lcamara	-77.60416133	-0.687496907	native
Lcamara	-77.60416133	-1.062496926	native
Lcamara	-77.645828	1.312503198	native
Lcamara	-77.770828	8.979170264	native
Lcamara	-78.06249468	0.437503152	native
Lcamara	-78.14582802	7.479170186	native
Lcamara	-78.18749469	-2.520830336	native
Lcamara	-78.35416137	-3.43749705	native
Lcamara	-78.47916137	-0.145830212	native
Lcamara	-78.47916137	0.770836503	native
Lcamara	-78.52082804	-0.187496881	native
Lcamara	-78.52082804	0.062503133	native
Lcamara	-78.56249471	-3.43749705	native
Lcamara	-78.64582805	-4.52083044	native
Lcamara	-78.68749472	-0.187496881	native
Lcamara	-78.72916139	-2.770830349	native
Lcamara	-78.81249472	9.395836953	native
Lcamara	-78.89582806	-2.854163686	native
Lcamara	-78.9791614	-0.312496887	native
Lcamara	-78.9791614	9.312503615	native
Lcamara	-79.06249474	9.229170277	native
Lcamara	-79.1041614	-2.187496985	native
Lcamara	-79.14582807	-4.895830459	native
Lcamara	-79.18749474	-6.020830518	native
Lcamara	-79.22916141	-0.312496887	native
Lcamara	-79.22916141	-3.562497057	native
Lcamara	-79.22916141	-3.645830394	native
Lcamara	-79.52082809	-1.812496965	native
Lcamara	-79.56249476	8.979170264	native
Lcamara	-79.6458281	9.47917029	native
Lcamara	-79.68749477	9.270836946	native
Lcamara	-79.68749477	9.47917029	native
Lcamara	-79.72916144	9.312503615	native
Lcamara	-79.85416144	9.14583694	native
Lcamara	-79.89582811	-2.770830349	native
Lcamara	-79.93749478	-2.770830349	native
Lcamara	-80.06249479	7.437503517	native
Lcamara	-80.68749482	8.187503556	native
Lcamara	-80.8541615	7.729170199	native
Lcamara	-81.5208282	8.187503556	native
Lcamara	-81.56249487	7.812503537	native
Lcamara	-82.22916157	8.687503582	native
Lcamara	-82.43749491	8.729170251	native
Lcamara	-82.52082825	9.354170284	native
Lcamara	-82.72916159	9.645836966	native
Lcamara	-82.77082826	8.895836927	native
Lcamara	-82.89582827	8.937503595	native
Lcamara	-82.93749494	8.937503595	native
Lcamara	-82.97916161	8.312503563	native
Lcamara	-82.97916161	9.020836933	native
Lcamara	-83.22916162	8.687503582	native
Lcamara	-83.43749496	9.812503641	native
Lcamara	-83.47916163	8.479170238	native
Lcamara	-83.5208283	10.52083701	native
Lcamara	-83.5208283	8.604170245	native
Lcamara	-83.5208283	8.687503582	native
Lcamara	-83.56249497	8.729170251	native
Lcamara	-83.56249497	9.14583694	native
Lcamara	-83.60416164	8.479170238	native
Lcamara	-83.60416164	8.729170251	native
Lcamara	-83.85416165	10.18750366	native
Lcamara	-83.93749499	9.812503641	native
Lcamara	-83.97916166	9.47917029	native
Lcamara	-83.97916166	9.812503641	native
Lcamara	-84.062495	9.979170316	native
Lcamara	-84.10416167	9.812503641	native
Lcamara	-84.10416167	9.979170316	native
Lcamara	-84.14582833	9.437503621	native
Lcamara	-84.14582833	9.937503648	native
Lcamara	-84.14582833	9.979170316	native
Lcamara	-84.187495	9.979170316	native
Lcamara	-84.27082834	9.729170303	native
Lcamara	-84.35416168	11.10417038	native
Lcamara	-84.39582835	9.687503634	native
Lcamara	-84.52082835	9.729170303	native
Lcamara	-84.56249502	9.729170303	native
Lcamara	-84.60416169	10.02083699	native
Lcamara	-84.60416169	9.770836972	native
Lcamara	-84.77082837	10.89583703	native
Lcamara	-84.77082837	13.64583717	native
Lcamara	-84.77082837	13.68750384	native
Lcamara	-84.77082837	13.72917051	native
Lcamara	-84.81249504	10.270837	native
Lcamara	-84.81249504	10.31250367	native
Lcamara	-84.97916171	10.68750369	native
Lcamara	-85.14582839	10.72917036	native
Lcamara	-85.14582839	9.812503641	native
Lcamara	-85.31249506	10.395837	native
Lcamara	-85.31249506	10.77083702	native
Lcamara	-85.35416173	10.14583699	native
Lcamara	-85.35416173	10.77083702	native
Lcamara	-85.35416173	10.81250369	native
Lcamara	-85.3958284	10.35417034	native
Lcamara	-85.43749507	10.97917037	native
Lcamara	-85.47916174	10.9375037	native
Lcamara	-85.60416174	10.81250369	native
Lcamara	-85.60416174	10.9375037	native
Lcamara	-85.60416174	12.10417043	native
Lcamara	-85.64582841	10.89583703	native
Lcamara	-85.85416176	10.9375037	native
Lcamara	-85.89582843	15.93750396	native
Lcamara	-85.93749509	15.93750396	native
Lcamara	-86.22916178	11.56250373	native
Lcamara	-86.81249514	15.77083729	native
Lcamara	-86.93749515	21.1041709	native
Lcamara	-86.97916182	20.31250419	native
Lcamara	-87.10416182	14.18750387	native
Lcamara	-87.18749516	21.2291709	native
Lcamara	-87.35416183	20.31250419	native
Lcamara	-87.60416185	14.97917058	native
Lcamara	-87.60416185	19.77083749	native
Lcamara	-87.64582852	20.77083755	native
Lcamara	-87.68749519	20.4375042	native
Lcamara	-87.72916185	20.47917086	native
Lcamara	-87.77082852	19.8958375	native
Lcamara	-88.02082854	14.39583721	native
Lcamara	-88.06249521	19.31250414	native
Lcamara	-88.10416187	13.93750386	native
Lcamara	-88.10416187	19.43750414	native
Lcamara	-88.14582854	13.93750386	native
Lcamara	-88.14582854	19.39583747	native
Lcamara	-88.14582854	19.43750414	native
Lcamara	-88.18749521	19.02083745	native
Lcamara	-88.18749521	20.68750421	native
Lcamara	-88.22916188	20.68750421	native
Lcamara	-88.35416189	18.0208374	native
Lcamara	-88.39582856	18.39583742	native
Lcamara	-88.52082856	17.02083735	native
Lcamara	-88.52082856	18.0208374	native
Lcamara	-88.52082856	18.22917075	native
Lcamara	-88.52082856	18.47917076	native
Lcamara	-88.56249523	18.0208374	native
Lcamara	-88.77082858	17.22917069	native
Lcamara	-88.81249524	17.97917073	native
Lcamara	-88.85416191	17.97917073	native
Lcamara	-88.89582858	20.4375042	native
Lcamara	-88.93749525	16.97917068	native
Lcamara	-88.93749525	17.02083735	native
Lcamara	-88.97916192	20.47917086	native
Lcamara	-89.02082859	17.10417069	native
Lcamara	-89.10416193	17.10417069	native
Lcamara	-89.22916193	13.4791705	native
Lcamara	-89.2708286	13.68750384	native
Lcamara	-89.2708286	17.3541707	native
Lcamara	-89.2708286	17.64583738	native
Lcamara	-89.2708286	18.47917076	native
Lcamara	-89.35416194	18.77083744	native
Lcamara	-89.47916195	20.39583753	native
Lcamara	-89.56249528	13.68750384	native
Lcamara	-89.56249528	17.31250403	native
Lcamara	-89.56249528	18.52083743	native
Lcamara	-89.56249528	20.35417086	native
Lcamara	-89.60416195	20.97917089	native
Lcamara	-89.64582862	20.22917085	native
Lcamara	-89.68749529	16.97917068	native
Lcamara	-89.68749529	20.06250418	native
Lcamara	-89.68749529	20.47917086	native
Lcamara	-89.72916196	16.97917068	native
Lcamara	-89.77082863	19.56250415	native
Lcamara	-89.8124953	20.4375042	native
Lcamara	-89.9374953	13.81250385	native
Lcamara	-89.9374953	16.81250401	native
Lcamara	-89.9374953	18.52083743	native
Lcamara	-89.9374953	18.5625041	native
Lcamara	-89.97916197	13.81250385	native
Lcamara	-90.06249531	13.81250385	native
Lcamara	-90.10416198	19.52083748	native
Lcamara	-90.18749532	14.27083721	native
Lcamara	-90.18749532	20.10417084	native
Lcamara	-90.18749532	20.77083755	native
Lcamara	-90.27082865	20.02083751	native
Lcamara	-90.31249532	20.18750418	native
Lcamara	-90.35416199	20.47917086	native
Lcamara	-90.39582866	19.93750417	native
Lcamara	-90.43749533	19.18750413	native
Lcamara	-90.43749533	20.52083753	native
Lcamara	-90.479162	19.81250416	native
Lcamara	-90.52082867	14.60417056	native
Lcamara	-90.52082867	19.72917082	native
Lcamara	-90.52082867	19.77083749	native
Lcamara	-90.52082867	19.81250416	native
Lcamara	-90.604162	14.47917055	native
Lcamara	-90.72916201	18.72917077	native
Lcamara	-90.77082868	17.8958374	native
Lcamara	-90.89582869	16.77083734	native
Lcamara	-90.93749536	16.77083734	native
Lcamara	-90.97916202	16.687504	native
Lcamara	-91.10416203	18.0208374	native
Lcamara	-91.10416203	18.18750408	native
Lcamara	-91.10416203	19.02083745	native
Lcamara	-91.31249537	17.27083736	native
Lcamara	-91.68749539	18.6875041	native
Lcamara	-91.68749539	18.72917077	native
Lcamara	-91.77082873	17.97917073	native
Lcamara	-91.85416207	18.60417077	native
Lcamara	-91.89582874	14.89583724	native
Lcamara	-91.97916208	18.60417077	native
Lcamara	-92.14582875	15.02083725	native
Lcamara	-92.14582875	15.06250391	native
Lcamara	-92.14582875	15.18750392	native
Lcamara	-92.14582875	16.89583734	native
Lcamara	-92.14582875	16.93750401	native
Lcamara	-92.27082876	16.81250401	native
Lcamara	-92.31249543	16.93750401	native
Lcamara	-92.3541621	14.93750391	native
Lcamara	-92.43749543	16.52083732	native
Lcamara	-92.43749543	16.81250401	native
Lcamara	-92.43749543	16.93750401	native
Lcamara	-92.4791621	14.97917058	native
Lcamara	-92.4791621	15.02083725	native
Lcamara	-92.4791621	16.85417067	native
Lcamara	-92.4791621	16.89583734	native
Lcamara	-92.52082877	16.89583734	native
Lcamara	-92.56249544	16.89583734	native
Lcamara	-92.60416211	15.56250394	native
Lcamara	-92.60416211	16.72917067	native
Lcamara	-92.64582878	15.64583728	native
Lcamara	-92.77082878	16.93750401	native
Lcamara	-92.85416212	16.93750401	native
Lcamara	-93.0208288	17.39583737	native
Lcamara	-93.31249548	16.81250401	native
Lcamara	-93.31249548	18.22917075	native
Lcamara	-93.39582882	16.0208373	native
Lcamara	-93.39582882	16.06250397	native
Lcamara	-93.39582882	16.687504	native
Lcamara	-93.43749549	16.06250397	native
Lcamara	-93.43749549	16.10417064	native
Lcamara	-93.47916215	16.06250397	native
Lcamara	-93.47916215	17.85417073	native
Lcamara	-93.52082882	16.22917064	native
Lcamara	-93.60416216	16.22917064	native
Lcamara	-93.60416216	16.27083731	native
Lcamara	-93.72916217	16.0208373	native
Lcamara	-94.72916222	18.35417075	native
Lcamara	-94.85416223	18.22917075	native
Lcamara	-94.89582889	18.27083742	native
Lcamara	-94.97916223	16.60417066	native
Lcamara	-95.06249557	18.60417077	native
Lcamara	-95.10416224	18.47917076	native
Lcamara	-95.18749558	16.18750397	native
Lcamara	-95.18749558	16.22917064	native
Lcamara	-95.22916225	16.31250398	native
Lcamara	-95.27082891	16.35417065	native
Lcamara	-95.31249558	16.35417065	native
Lcamara	-95.31249558	16.39583732	native
Lcamara	-95.39582892	18.52083743	native
Lcamara	-95.43749559	16.31250398	native
Lcamara	-95.52082893	16.10417064	native
Lcamara	-95.5624956	16.27083731	native
Lcamara	-95.6874956	15.97917063	native
Lcamara	-96.14582896	15.72917062	native
Lcamara	-96.14582896	19.18750413	native
Lcamara	-96.18749563	15.72917062	native
Lcamara	-96.18749563	15.77083729	native
Lcamara	-96.2291623	15.68750395	native
Lcamara	-96.27082897	16.31250398	native
Lcamara	-96.27082897	19.27083747	native
Lcamara	-96.31249564	16.31250398	native
Lcamara	-96.31249564	19.27083747	native
Lcamara	-96.31249564	19.31250414	native
Lcamara	-96.3541623	19.31250414	native
Lcamara	-96.39582897	15.68750395	native
Lcamara	-96.39582897	19.27083747	native
Lcamara	-96.39582897	19.60417082	native
Lcamara	-96.39582897	19.72917082	native
Lcamara	-96.43749564	19.56250415	native
Lcamara	-96.47916231	19.56250415	native
Lcamara	-96.56249565	19.27083747	native
Lcamara	-96.60416232	19.77083749	native
Lcamara	-96.68749565	19.43750414	native
Lcamara	-96.68749565	19.77083749	native
Lcamara	-96.68749565	20.10417084	native
Lcamara	-96.77082899	19.31250414	native
Lcamara	-96.81249566	19.39583747	native
Lcamara	-96.81249566	19.43750414	native
Lcamara	-96.93749567	19.56250415	native
Lcamara	-96.93749567	19.60417082	native
Lcamara	-97.06249567	18.14583741	native
Lcamara	-97.06249567	18.77083744	native
Lcamara	-97.10416234	18.18750408	native
Lcamara	-97.22916235	18.22917075	native
Lcamara	-97.27082902	18.6875041	native
Lcamara	-97.27082902	20.02083751	native
Lcamara	-97.31249569	18.39583742	native
Lcamara	-97.31249569	20.02083751	native
Lcamara	-97.43749569	18.31250408	native
Lcamara	-97.5624957	18.31250408	native
Lcamara	-97.72916238	18.35417075	native
Lcamara	-97.89582905	17.18750403	native
Lcamara	-97.89582905	17.56250405	native
Lcamara	-97.89582905	19.43750414	native
Lcamara	-97.89582905	19.52083748	native
Lcamara	-98.06249573	17.31250403	native
Lcamara	-98.14582906	16.81250401	native
Lcamara	-98.14582906	17.68750405	native
Lcamara	-98.14582906	19.14583746	native
Lcamara	-98.14582906	23.22917101	native
Lcamara	-98.52082908	20.35417086	native
Lcamara	-98.56249575	17.81250406	native
Lcamara	-98.56249575	19.14583746	native
Lcamara	-98.56249575	23.39583768	native
Lcamara	-98.7708291	20.31250419	native
Lcamara	-98.8958291	17.77083739	native
Lcamara	-98.8958291	18.52083743	native
Lcamara	-98.93749577	17.3541707	native
Lcamara	-98.93749577	17.64583738	native
Lcamara	-98.93749577	17.97917073	native
Lcamara	-98.93749577	18.5625041	native
Lcamara	-98.97916244	17.93750406	native
Lcamara	-98.97916244	18.47917076	native
Lcamara	-99.02082911	17.60417071	native
Lcamara	-99.02082911	17.72917072	native
Lcamara	-99.02082911	18.39583742	native
Lcamara	-99.02082911	18.43750409	native
Lcamara	-99.02082911	18.47917076	native
Lcamara	-99.06249578	17.56250405	native
Lcamara	-99.06249578	17.60417071	native
Lcamara	-99.06249578	17.72917072	native
Lcamara	-99.06249578	17.81250406	native
Lcamara	-99.06249578	17.93750406	native
Lcamara	-99.06249578	18.39583742	native
Lcamara	-99.06249578	18.43750409	native
Lcamara	-99.06249578	18.47917076	native
Lcamara	-99.14582912	18.60417077	native
Lcamara	-99.14582912	23.14583767	native
Lcamara	-99.22916245	17.72917072	native
Lcamara	-99.22916245	19.27083747	native
Lcamara	-99.22916245	23.60417103	native
Lcamara	-99.5624958	17.39583737	native
Lcamara	-99.5624958	17.97917073	native
Lcamara	-99.5624958	19.60417082	native
Lcamara	-99.5624958	19.81250416	native
Lcamara	-99.5624958	23.31250435	native
Lcamara	-99.5624958	23.39583768	native
Lcamara	-99.5624958	23.43750435	native
Lcamara	-99.60416247	17.85417073	native
Lcamara	-99.60416247	19.18750413	native
Lcamara	-99.60416247	23.6458377	native
Lcamara	-99.64582914	18.81250411	native
Lcamara	-99.77082915	17.56250405	native
Lcamara	-99.77082915	19.52083748	native
Lcamara	-99.85416249	17.72917072	native
Lcamara	-99.85416249	19.77083749	native
Lcamara	-99.85416249	23.52083769	native
Lcamara	-99.97916249	20.4375042	native
Lcamara	114.479182	-28.31249835	australia
Lcamara	115.9375154	-32.06249854	australia
Lcamara	128.7291828	-15.77083103	australia
Lcamara	128.7291828	-15.85416436	australia
Lcamara	128.7708494	-15.77083103	australia
Lcamara	130.7291829	-12.56249753	australia
Lcamara	130.8541829	-11.85416416	australia
Lcamara	130.8541829	-12.39583085	australia
Lcamara	130.8541829	-12.43749752	australia
Lcamara	130.9375162	-12.39583085	australia
Lcamara	131.1458496	-13.18749756	australia
Lcamara	131.1875162	-13.18749756	australia
Lcamara	136.1458498	-34.31249866	australia
Lcamara	142.6041835	-10.7291641	australia
Lcamara	143.3958502	-12.60416419	australia
Lcamara	143.6875169	-14.47916429	australia
Lcamara	144.2708502	-17.43749778	australia
Lcamara	144.8125169	-18.10416448	australia
Lcamara	144.8541836	-18.14583115	australia
Lcamara	145.1041836	-15.43749768	australia
Lcamara	145.2291836	-15.47916434	australia
Lcamara	145.2708503	-15.47916434	australia
Lcamara	145.2708503	-15.9374977	australia
Lcamara	145.2708503	-16.89583109	australia
Lcamara	145.3958503	-16.89583109	australia
Lcamara	145.3958503	-17.10416443	australia
Lcamara	145.4791836	-17.2708311	australia
Lcamara	145.562517	-16.97916442	australia
Lcamara	145.562517	-17.2708311	australia
Lcamara	145.6041836	-17.02083109	australia
Lcamara	145.6041836	-17.39583111	australia
Lcamara	145.6458503	-16.85416442	australia
Lcamara	145.6458503	-17.31249777	australia
Lcamara	145.7291837	-16.81249775	australia
Lcamara	145.812517	-18.81249785	australia
Lcamara	145.812517	-18.85416452	australia
Lcamara	146.1458503	-18.64583118	australia
Lcamara	146.2291837	-20.18749792	australia
Lcamara	146.3541837	-19.47916455	australia
Lcamara	146.5208504	-23.0208314	australia
Lcamara	146.562517	-19.43749788	australia
Lcamara	146.812517	-19.27083121	australia
Lcamara	147.2291837	-20.97916463	australia
Lcamara	147.6875171	-23.39583142	australia
Lcamara	147.7291838	-20.22916459	australia
Lcamara	147.7708504	-20.60416461	australia
Lcamara	147.9791838	-20.72916462	australia
Lcamara	148.0208504	-20.47916461	australia
Lcamara	148.0625171	-20.14583125	australia
Lcamara	148.4791838	-20.81249796	australia
Lcamara	148.5625171	-21.18749798	australia
Lcamara	148.8541838	-28.6458317	australia
Lcamara	148.8958505	-28.52083169	australia
Lcamara	149.0625172	-22.72916472	australia
Lcamara	149.5625172	-22.77083139	australia
Lcamara	149.6041839	-23.31249809	australia
Lcamara	149.6458505	-23.35416476	australia
Lcamara	149.8541839	-22.85416473	australia
Lcamara	149.8541839	-22.8958314	australia
Lcamara	149.8541839	-23.06249807	australia
Lcamara	150.1041839	-22.97916474	australia
Lcamara	150.1458506	-23.18749808	australia
Lcamara	150.1875172	-23.0208314	australia
Lcamara	150.2291839	-23.06249807	australia
Lcamara	150.2708506	-23.0208314	australia
Lcamara	150.3541839	-23.47916476	australia
Lcamara	150.3958506	-23.68749811	australia
Lcamara	150.4791839	-23.31249809	australia
Lcamara	150.4791839	-35.35416538	australia
Lcamara	150.5208506	-24.35416481	australia
Lcamara	150.5208506	-34.72916535	australia
Lcamara	150.5625172	-23.31249809	australia
Lcamara	150.5625172	-23.35416476	australia
Lcamara	150.5625172	-24.2291648	australia
Lcamara	150.5625172	-34.77083202	australia
Lcamara	150.5625172	-34.89583202	australia
Lcamara	150.6041839	-34.85416536	australia
Lcamara	150.6458506	-24.2291648	australia
Lcamara	150.6458506	-33.8541653	australia
Lcamara	150.6458506	-34.77083202	australia
Lcamara	150.6875172	-34.60416534	australia
Lcamara	150.6875172	-34.68749868	australia
Lcamara	150.7291839	-23.47916476	australia
Lcamara	150.7708506	-23.81249811	australia
Lcamara	150.8125173	-34.520832	australia
Lcamara	150.8125173	-34.60416534	australia
Lcamara	150.8541839	-23.60416477	australia
Lcamara	150.8541839	-34.60416534	australia
Lcamara	150.9791839	-23.72916478	australia
Lcamara	150.9791839	-23.81249811	australia
Lcamara	151.0208506	-24.8958315	australia
Lcamara	151.0625173	-23.68749811	australia
Lcamara	151.1041839	-33.89583197	australia
Lcamara	151.1458506	-32.72916524	australia
Lcamara	151.3541839	-23.93749812	australia
Lcamara	151.3958506	-25.52083154	australia
Lcamara	151.4375173	-24.43749815	australia
Lcamara	151.4375173	-25.60416487	australia
Lcamara	151.479184	-33.02083193	australia
Lcamara	151.604184	-27.35416496	australia
Lcamara	151.6458506	-26.85416494	australia
Lcamara	151.729184	-28.06249833	australia
Lcamara	151.8125173	-24.18749813	australia
Lcamara	151.8958506	-25.47916487	australia
Lcamara	151.8958506	-25.60416487	australia
Lcamara	151.8958506	-26.14583157	australia
Lcamara	151.8958506	-27.52083164	australia
Lcamara	151.8958506	-27.60416498	australia
Lcamara	151.8958506	-27.68749831	australia
Lcamara	151.8958506	-28.18749834	australia
Lcamara	151.8958506	-28.31249835	australia
Lcamara	151.9375173	-26.56249826	australia
Lcamara	151.9375173	-26.81249827	australia
Lcamara	151.9375173	-27.52083164	australia
Lcamara	151.9375173	-27.64583165	australia
Lcamara	151.979184	-25.64583154	australia
Lcamara	151.979184	-27.22916496	australia
Lcamara	152.0208507	-27.3124983	australia
Lcamara	152.0625173	-27.27083163	australia
Lcamara	152.0625173	-27.3124983	australia
Lcamara	152.0625173	-28.39583169	australia
Lcamara	152.104184	-25.06249818	australia
Lcamara	152.1458507	-28.43749835	australia
Lcamara	152.1875173	-26.93749828	australia
Lcamara	152.1875173	-27.35416496	australia
Lcamara	152.229184	-27.60416498	australia
Lcamara	152.229184	-27.89583166	australia
Lcamara	152.3125173	-28.31249835	australia
Lcamara	152.3958507	-30.81249848	australia
Lcamara	152.479184	-25.60416487	australia
Lcamara	152.479184	-29.85416509	australia
Lcamara	152.604184	-26.43749825	australia
Lcamara	152.604184	-28.93749838	australia
Lcamara	152.6458507	-30.89583182	australia
Lcamara	152.6875174	-26.18749824	australia
Lcamara	152.6875174	-27.3124983	australia
Lcamara	152.729184	-28.31249835	australia
Lcamara	152.7708507	-27.3124983	australia
Lcamara	152.7708507	-27.35416496	australia
Lcamara	152.7708507	-27.39583163	australia
Lcamara	152.7708507	-29.56249841	australia
Lcamara	152.8125174	-26.18749824	australia
Lcamara	152.8125174	-26.72916493	australia
Lcamara	152.8125174	-27.47916497	australia
Lcamara	152.8125174	-28.27083168	australia
Lcamara	152.854184	-27.47916497	australia
Lcamara	152.854184	-27.52083164	australia
Lcamara	152.854184	-28.18749834	australia
Lcamara	152.854184	-28.22916501	australia
Lcamara	152.8958507	-26.18749824	australia
Lcamara	152.8958507	-26.7708316	australia
Lcamara	152.8958507	-27.47916497	australia
Lcamara	152.9375174	-27.47916497	australia
Lcamara	152.979184	-27.60416498	australia
Lcamara	152.979184	-28.18749834	australia
Lcamara	152.979184	-28.31249835	australia
Lcamara	152.979184	-30.31249845	australia
Lcamara	153.0625174	-26.31249824	australia
Lcamara	153.104184	-27.35416496	australia
Lcamara	153.104184	-29.3124984	australia
Lcamara	153.104184	-30.18749845	australia
Lcamara	153.1458507	-28.06249833	australia
Lcamara	153.1875174	-28.104165	australia
Lcamara	153.1875174	-28.18749834	australia
Lcamara	153.2708507	-24.93749817	australia
Lcamara	153.2708507	-28.18749834	australia
Lcamara	153.5208507	-27.4374983	australia
Lcamara	10.02084324	2.104169906	africa
Lcamara	13.60417676	-18.89583119	africa
Lcamara	14.06251012	-1.770830296	africa
Lcamara	18.60417702	-33.89583197	africa
Lcamara	21.35417717	-34.14583198	africa
Lcamara	25.10417736	-33.39583195	africa
Lcamara	25.8541774	-17.93749781	africa
Lcamara	26.60417744	-33.39583195	africa
Lcamara	26.85417746	-23.14583141	africa
Lcamara	28.35417753	-24.64583149	africa
Lcamara	28.35417753	-25.64583154	africa
Lcamara	28.35417753	-25.89583155	africa
Lcamara	28.60417755	-24.64583149	africa
Lcamara	29.10417757	-25.39583153	africa
Lcamara	29.35417759	-25.39583153	africa
Lcamara	30.10417762	-31.14583183	africa
Lcamara	30.14584429	-17.35416444	africa
Lcamara	30.31251097	-25.64583154	africa
Lcamara	30.35417764	-24.14583146	africa
Lcamara	30.35417764	-29.81249843	africa
Lcamara	30.35417764	-29.89583176	africa
Lcamara	30.56251098	-19.22916454	africa
Lcamara	30.60417765	-29.52083174	africa
Lcamara	30.77084433	-17.89583114	africa
Lcamara	30.85417766	-24.39583148	africa
Lcamara	30.85417766	-24.8958315	africa
Lcamara	30.85417766	-25.14583152	africa
Lcamara	30.85417766	-29.64583175	africa
Lcamara	30.89584433	-27.3124983	africa
Lcamara	30.937511	-20.27083126	africa
Lcamara	31.02084434	-17.77083113	africa
Lcamara	31.02084434	-17.8124978	africa
Lcamara	31.02084434	-20.10416459	africa
Lcamara	31.02084434	-20.22916459	africa
Lcamara	31.02084434	-20.27083126	africa
Lcamara	31.06251101	-20.27083126	africa
Lcamara	31.10417768	-17.97916448	africa
Lcamara	31.10417768	-20.22916459	africa
Lcamara	31.10417768	-25.14583152	africa
Lcamara	31.10417768	-25.39583153	africa
Lcamara	31.10417768	-25.89583155	africa
Lcamara	31.10417768	-27.89583166	africa
Lcamara	31.10417768	-28.6458317	africa
Lcamara	31.10417768	-29.64583175	africa
Lcamara	31.14584435	-17.77083113	africa
Lcamara	31.14584435	-17.8124978	africa
Lcamara	31.18751101	-17.68749779	africa
Lcamara	31.18751101	-17.72916446	africa
Lcamara	31.27084435	-17.77083113	africa
Lcamara	31.27084435	-17.85416447	africa
Lcamara	31.35417769	-26.14583157	africa
Lcamara	31.35417769	-27.89583166	africa
Lcamara	31.43751103	-1.145830264	africa
Lcamara	31.85417772	-26.14583157	africa
Lcamara	31.89584438	-26.72916493	africa
Lcamara	32.18751107	-18.77083118	africa
Lcamara	32.56251109	0.354169814	africa
Lcamara	32.68751109	-18.89583119	africa
Lcamara	32.68751109	-20.39583127	africa
Lcamara	32.68751109	-20.43749794	africa
Lcamara	32.72917776	-18.56249784	africa
Lcamara	32.72917776	-20.39583127	africa
Lcamara	32.72917776	-20.43749794	africa
Lcamara	32.77084443	-19.10416453	africa
Lcamara	32.77084443	-20.43749794	africa
Lcamara	32.85417777	-20.02083125	africa
Lcamara	32.89584444	-18.68749785	africa
Lcamara	32.93751111	-18.31249783	africa
Lcamara	32.93751111	-18.68749785	africa
Lcamara	32.97917777	-18.31249783	africa
Lcamara	32.97917777	-18.39583116	africa
Lcamara	33.06251111	-18.39583116	africa
Lcamara	33.18751112	-24.93749817	africa
Lcamara	36.47917796	-7.520830596	africa
Lcamara	36.60417796	-3.312497044	africa
Lcamara	36.64584463	-3.312497044	africa
Lcamara	36.6875113	-3.354163712	africa
Lcamara	36.77084464	-3.395830381	africa
Lcamara	36.85417798	-7.812497278	africa
Lcamara	36.89584465	-7.854163947	africa
Lcamara	37.8958447	-4.395830433	africa
Lcamara	37.97917804	-4.270830427	africa
Lcamara	37.97917804	-4.312497096	africa
Lcamara	38.39584472	-5.062497135	africa
Lcamara	38.43751139	-5.062497135	africa
Lcamara	38.60417807	-15.14583099	africa
Lcamara	38.60417807	-5.104163804	africa
Lcamara	38.81251141	-4.812497122	africa
Lcamara	38.81251141	-4.854163791	africa
Lcamara	47.18751185	-24.68749816	africa
Lcamara	47.43751186	-21.27083131	africa
Lcamara	48.31251191	-18.85416452	africa
Lcamara	50.02084533	-15.77083103	africa
Lcamara	50.31251201	-15.8124977	africa
Lcamara	50.35417868	-15.31249767	africa
Lcamara	50.35417868	-15.68749769	africa
Lcamara	72.729167	21.1875	india
Lcamara	72.770833	21.229167	india
Lcamara	72.979167	21.1875	india
Lcamara	74.5625	26.479167	india
Lcamara	74.604167	26.479167	india
Lcamara	74.645833	26.479167	india
Lcamara	75.270833	26.6875	india
Lcamara	75.5625	26.8125	india
Lcamara	75.645833	26.854167	india
Lcamara	75.729167	26.854167	india
Lcamara	75.770833	26.9375	india
Lcamara	76.270833	10.270833	india
Lcamara	76.3125	10.3125	india
Lcamara	76.3125	32.229167	india
Lcamara	76.354167	10.3125	india
Lcamara	76.4375	11.729167	india
Lcamara	76.479167	11.729167	india
Lcamara	76.520833	11.520833	india
Lcamara	76.520833	32.104167	india
Lcamara	76.5625	11.5625	india
Lcamara	76.604167	11.604167	india
Lcamara	76.770833	30.770833	india
Lcamara	76.8125	30.770833	india
Lcamara	76.979167	11.9375	india
Lcamara	77.020833	11.9375	india
Lcamara	77.1875	10.270833	india
Lcamara	77.1875	10.3125	india
Lcamara	77.229167	10.3125	india
Lcamara	77.229167	10.354167	india
Lcamara	77.395833	23.3125	india
Lcamara	77.395833	23.354167	india
Lcamara	77.4375	23.1875	india
Lcamara	77.479167	23.145833	india
Lcamara	77.479167	23.3125	india
Lcamara	77.520833	12.0625	india
Lcamara	77.5625	12.020833	india
Lcamara	77.5625	12.0625	india
Lcamara	77.6875	8.729167	india
Lcamara	77.979167	30.3125	india
Lcamara	78.020833	30.3125	india
Lcamara	78.0625	30.354167	india
Lcamara	78.0625	30.395833	india
Lcamara	78.104167	29.9375	india
Lcamara	78.145833	29.9375	india
Lcamara	78.479167	17.145833	india
Lcamara	78.520833	17.5625	india
Lcamara	78.5625	17.604167	india
Lcamara	78.770833	23.8125	india
Lcamara	78.770833	30.229167	india
Lcamara	78.8125	30.229167	india
Lcamara	79.6875	11.979167	india
Lcamara	79.8125	11.979167	india
Lcamara	79.9375	23.145833	india
Lcamara	79.9375	23.1875	india
Lcamara	79.979167	23.1875	india
Lcamara	80.395833	23.8125	india
Lcamara	80.395833	23.854167	india
Lcamara	80.4375	23.854167	india
Lcamara	80.854167	25.145833	india
Lcamara	80.854167	25.1875	india
Lcamara	81.270833	21.1875	india
Lcamara	81.3125	21.1875	india
Lcamara	81.3125	24.5625	india
Lcamara	81.354167	21.1875	india
Lcamara	81.395833	21.1875	india
Lcamara	81.4375	21.1875	india
Lcamara	81.479167	21.229167	india
Lcamara	81.5625	21.270833	india
Lcamara	81.604167	21.270833	india
Lcamara	81.645833	21.229167	india
Lcamara	82.145833	22.104167	india
Lcamara	82.145833	22.145833	india
Lcamara	82.145833	22.270833	india
Lcamara	82.1875	22.270833	india
Lcamara	83.229167	17.770833	india
Lcamara	83.3125	17.770833	india
Lcamara	83.354167	17.770833	india
Lcamara	83.354167	17.895833	india
Lcamara	86.145833	22.104167	india
Lcamara	88.354167	26.645833	india
Lcamara	88.354167	26.6875	india
Lcamara	88.4375	26.979167	india
Lcamara	88.4375	27.020833	india
Lcamara	92.6875	23.729167	india
